# Supplementary material
Source: PubMed Central journal article supplement (PMC4610867)
Supplement: NIHMS721455-supplement-1.pdf [file NIHMS721455-supplement-1.pdf]

**Figure S1:**

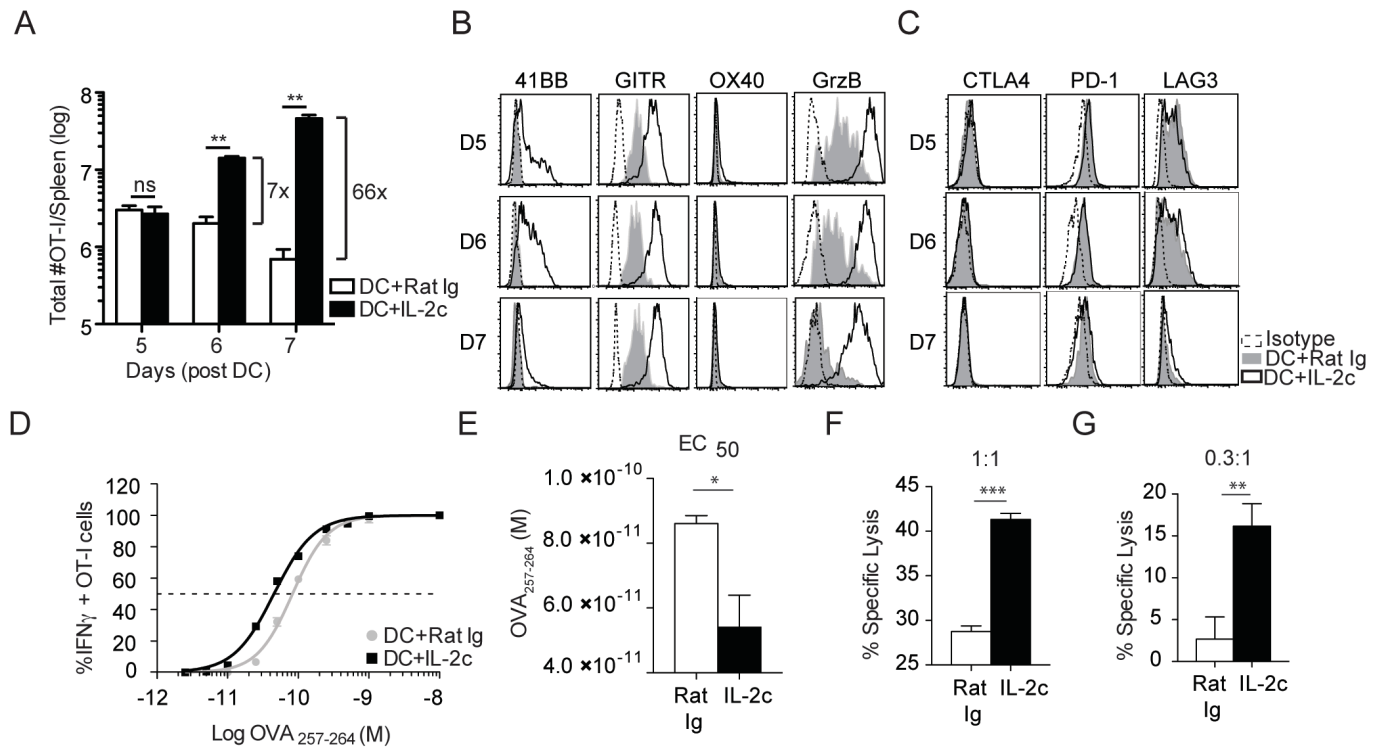

**Fig. S1. DC+IL-2c enhances Ag sensitivity and per-cell killing on OT-I cells.**  $3 \times 10^4$  OT-I cells were adoptively transferred into naïve B6 mice and subsequently immunized with DC-OVA $\pm$ IL-2c. Spleens were harvested from D5-7 to quantify number and surface phenotype. **(A)** Summary graph (mean  $\pm$  SEM) of total number of OT-I CD8 T cells from D5-7. **(B)** Histogram plots of costimulatory molecule and granzyme B expression in OT-I CD8 T cells from D5-7. **(C)** Histogram plots of inhibitory molecule expression on OT-I CD8 T cells from D5-7. **(D)** Functional avidity curves of DC $\pm$ IL-2c at D6 post-DC immunization. **(E)** EC<sub>50</sub> from (D). **(F)** *In vitro* cytotoxicity assay at E:T ratio of 1:1. **(G)** Same as (F), but at E:T of 0.3:1. Data are representative of 2 independent experiments with at least 3 mice/group. \*\*= $p < 0.005$ .

**Figure S2:**

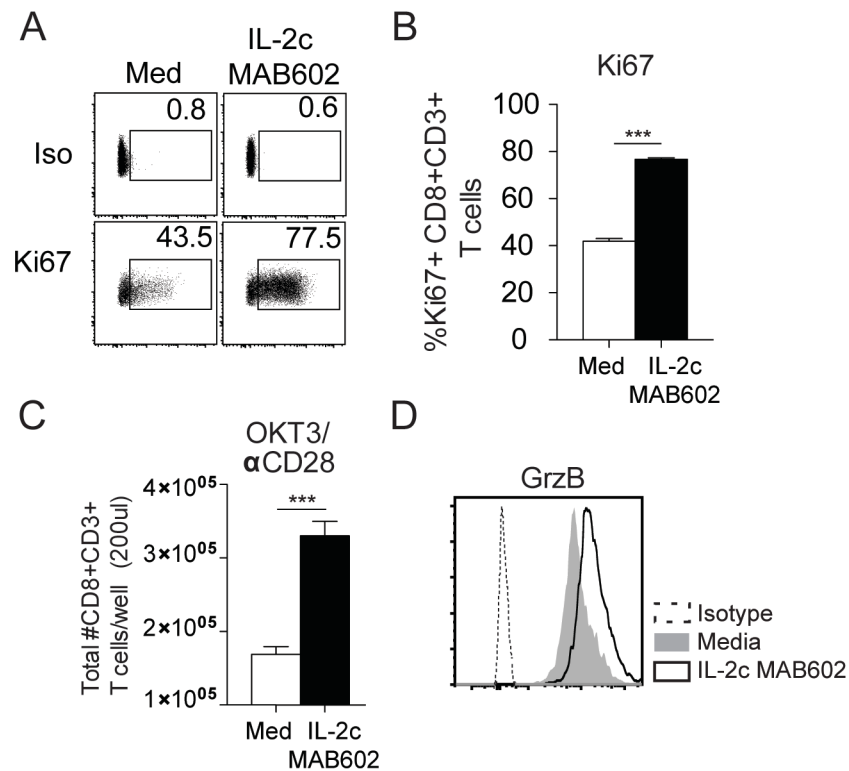

**Fig. S2. Enhanced activation of human CD8 T cells after huIL-2c MAB602 treatment.** CD8 T cells were isolated from LRS cones via negative magnetic bead selection and plated at  $2.5 \times 10^5$  cells/well. **(A)** Raw flow plots of Ki67+ cells from media or IL-2c MAB602-treated cells. **(B)** Summary bar graphs (mean  $\pm$  SEM) of %total Ki67+CD8+CD3+ cells per well. **(C)** Total number of CD8+CD3+ huT cells per well on D7 after OKT3/ $\alpha$ CD28 activation. **(D)** Representative histogram of granzyme B expression from media and huIL-2c MAB602-treated CD8+CD3+ cells. Data are representative of 3 independent experiments with at least 2 human blood samples/group. \*\*\* =  $p < 0.0005$

**Figure S3:**

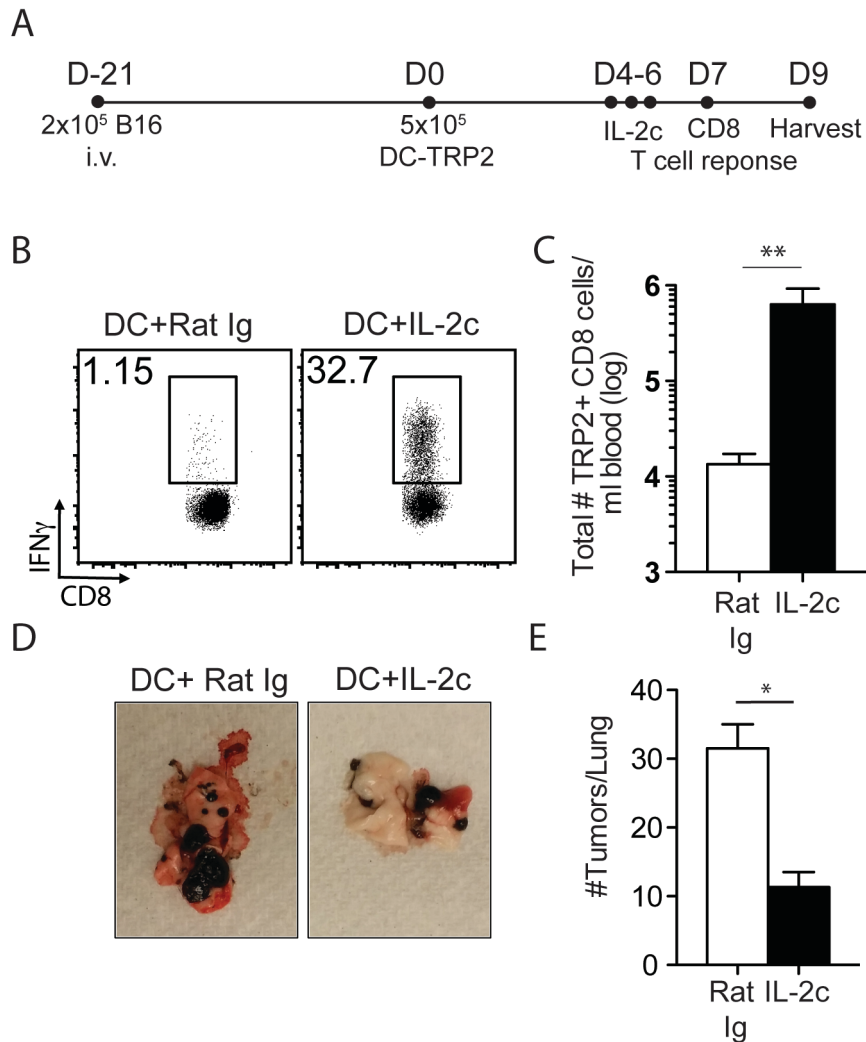

**Fig. S3. Late intervention with DC+IL-2c induces robust CD8 T cell response and tumor regression.** Naïve B6 mice were inoculated with  $2 \times 10^5$  B16 tumors i.v. and treated with DC+Rat Ig or DC+IL-2c on D21 post-inoculation. **(A)** Experimental approach. **(B)** Endogenous TRP2-specific CD8 T cells were quantified per ml of blood at D7 post-DC via ICS. **(C)** Summary bar graph (mean  $\pm$  SEM). **(D)** Representative images of perfused lungs at D30 post-transfer of B16 melanoma cells. **(E)** Summary bar graphs (mean  $\pm$  SEM) of total number of tumors per lung for all treatment groups. Data are representative of 2 independent experiments with at least four mice per treatment group. \*\*\* =  $p < 0.0005$ ; n.d., no data.

**Figure S4:**

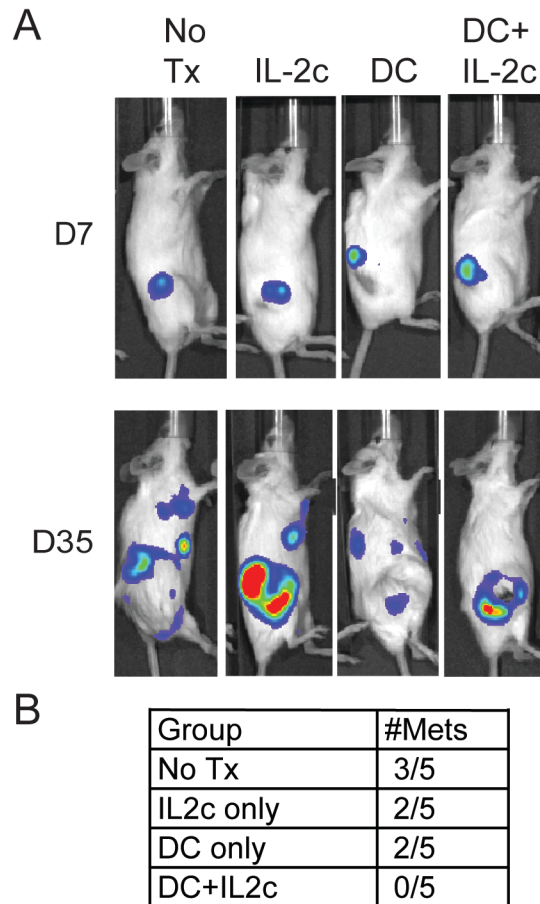

**Fig. S4. IL-2c alone does not prevent metastases in 4T1 tumor model.** Naïve BALB/c mice were inoculated with  $1 \times 10^5$  4T1-fLUC tumors orthotopically in mammary pad #9 and treated with PBS, IL-2c only, DC+Rat Ig or DC+IL-2c on D7 post-inoculation. **(A)** Whole-mouse images of all experimental groups at D7 and D35. **(B)** Summary table of metastases in each treatment group. Data include n=5 mice per group.
